# Supplementary material
Source: PubMed Central journal article supplement (PMC7856280)
Supplement: NIHMS1655231-supplement-6.pdf [file NIHMS1655231-supplement-6.pdf]

**Table S1**

| Severity Cohort                                | non-hospitalized | hospitalized | intubated      | deceased      | immunosuppressed         |
|------------------------------------------------|------------------|--------------|----------------|---------------|--------------------------|
| <b>Total</b>                                   | n = 18           | n = 45       | n = 27         | n = 10        | n = 13                   |
| <b>Demographics</b>                            |                  |              |                |               |                          |
| Age (median, range)                            | 26.5 (0 - 68)    | 66 (0 - 91)  | 63 (35 - 83)   | 60 (39 - 77)  | 60 (29 - 80)             |
| Sex (% male)                                   | 50% (9/18)       | 49% (22/45)  | 78% (21/27)    | 70% (7/10)    | 62% (8/13)               |
| Language, primary (% non-English)              | 39% (7/18)       | 36% (16/45)  | 59% (16/27)    | 20% (2/10)    | 8% (1/13)                |
| <b>Clinical Course</b>                         |                  |              |                |               |                          |
| PCR-positive days <sup>‡</sup> (median, range) | 11 (0 - 44)      | 17 (2 - 55)  | 34.5 (13 - 68) | 19.5 (7 - 35) | 36 (10 - 55)             |
| Hospitalized                                   | 0% (0/18)        | 100% (45/45) | 100% (27/27)   | 100% (10/10)  | 85% (11/13)              |
| Days hospitalized (median, range)              | -                | 5 (1 - 41)   | 43 (15 - 118)  | 31.5 (1 - 66) | 10 (0 - 50)              |
| Intubated                                      | 0% (0/18)        | 0% (0/45)    | 100% (27/27)   | 90% (9/10)    | 38% (5/13)               |
| Days intubated (median, range)                 | -                | -            | 26 (6 - 65)    | 22.5 (0 - 57) | 0 (0 - 41)               |
| ECMO                                           | 0% (0/18)        | 0% (0/45)    | 7% (2/27)      | 20% (2/10)    | 0% (0/13)                |
| Deceased                                       | 0% (0/18)        | 0% (0/45)    | 0% (0/27)      | 100% (10/10)  | 0% (0/13)                |
| <b>Pre-existing medical conditions</b>         |                  |              |                |               |                          |
| No significant conditions                      | 94% (17/18)      | 9% (4/45)    | 4% (1/27)      | 20% (2/10)    | 0% (0/13)                |
| Lung disease                                   | 0% (0/18)        | 31% (14/45)  | 11% (3/27)     | 10% (1/10)    | 0% (0/13)                |
| Heart disease                                  | 0% (0/18)        | 36% (16/45)  | 11% (3/27)     | 20% (2/10)    | 15% (2/13)               |
| Vascular disease                               | 0% (0/18)        | 13% (6/45)   | 0% (0/27)      | 10% (1/10)    | 0% (0/13)                |
| Hypertension                                   | 6% (1/18)        | 56% (25/45)  | 70% (19/27)    | 40% (4/10)    | 31% (4/13)               |
| Diabetes mellitus                              | 0% (0/18)        | 40% (18/45)  | 59% (16/27)    | 30% (3/10)    | 15% (2/13)               |
| Obesity                                        | 0% (0/18)        | 22% (10/45)  | 37% (10/27)    | 0% (0/10)     | 8% (1/13)                |
| Kidney disease                                 | 0% (0/18)        | 22% (10/45)  | 11% (3/27)     | 10% (1/10)    | 38% (5/13)               |
| Autoimmune disease                             | 6% (1/18)        | 7% (3/45)    | 0% (0/27)      | 10% (1/10)    | 46% (6/13)               |
| Hematologic malignancy                         | 0% (0/18)        | 0% (0/45)    | 0% (0/27)      | 0% (0/10)     | 23% (3/13)               |
| Non-hematology malignancy                      | 0% (0/18)        | 11% (5/45)   | 7% (2/27)      | 20% (2/10)    | 0% (0/13)                |
| Solid organ transplant                         | 0% (0/18)        | 0% (0/45)    | 0% (0/27)      | 10% (1/10)    | 46% (6/13)               |
| HSC transplant                                 | 0% (0/18)        | 0% (0/45)    | 0% (0/27)      | 0% (0/10)     | 8% (1/13)                |
| Immunosuppressed                               | 0% (0/18)        | 0% (0/45)    | 0% (0/27)      | 0% (0/10)     | 100% (13/13)             |
| <b>Treatments received</b>                     |                  |              |                |               |                          |
| Hydroxychloroquine                             | 0% (0/18)        | 9% (4/45)    | 11% (3/27)     | 10% (1/10)    | 8% (1/13)                |
| Azithromycin                                   | 0% (0/18)        | 7% (3/45)    | 15% (4/27)     | 10% (1/10)    | 23% (3/13)               |
| Remdesivir                                     | 0% (0/18)        | 7% (3/45)    | 15% (4/27)     | 10% (1/10)    | 38% (5/13)               |
| Tocilizumab <sup>†</sup>                       | 0% (0/18)        | 22% (10/45)  | 19% (5/27)     | 0% (0/10)     | 31% (4/13)               |
| Anakinra                                       | 0% (0/18)        | 0% (0/45)    | 4% (1/27)      | 0% (0/10)     | 0% (0/13)                |
| Corticosteroids                                | 0% (0/18)        | 7% (3/45)    | 7% (2/27)      | 10% (1/10)    | 15% (2/13) <sup>‡‡</sup> |

\* PCR-positive days is defined as the numbers of days from the first documents PCR-positive result to the last document PCR-positive result that was followed by at least one PCR-negative result

<sup>†</sup> The majority of patients receiving tocilizumab were enrolled in a blinded randomized control trial with 2:1 randomization of tocilizumab to placebo, except for two patient who received it off-label

<sup>‡‡</sup> In the immunosuppressed cohort, corticosteroid treatment refers to patients that newly started corticosteroids or had an increase in their baseline dose of corticosteroids (if applicable)

**Table S1. Clinical data from COVID-19 patients, Related to Figure 1. Clinical data is shown for each pre-defined severity cohort.**
