# Supplementary material
Source: PubMed Central journal article supplement (PMC7856280)

**Figure S1**

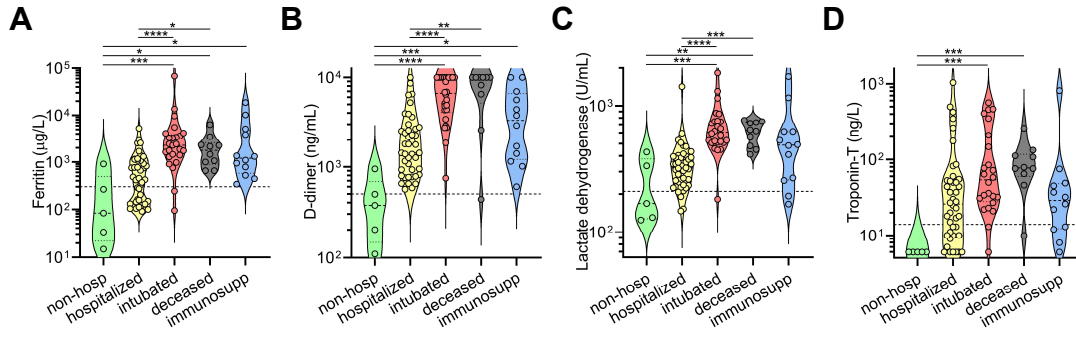

Supplement: NIHMS1655231-supplement-1.pdf [file NIHMS1655231-supplement-1.pdf]

**Figure S2**

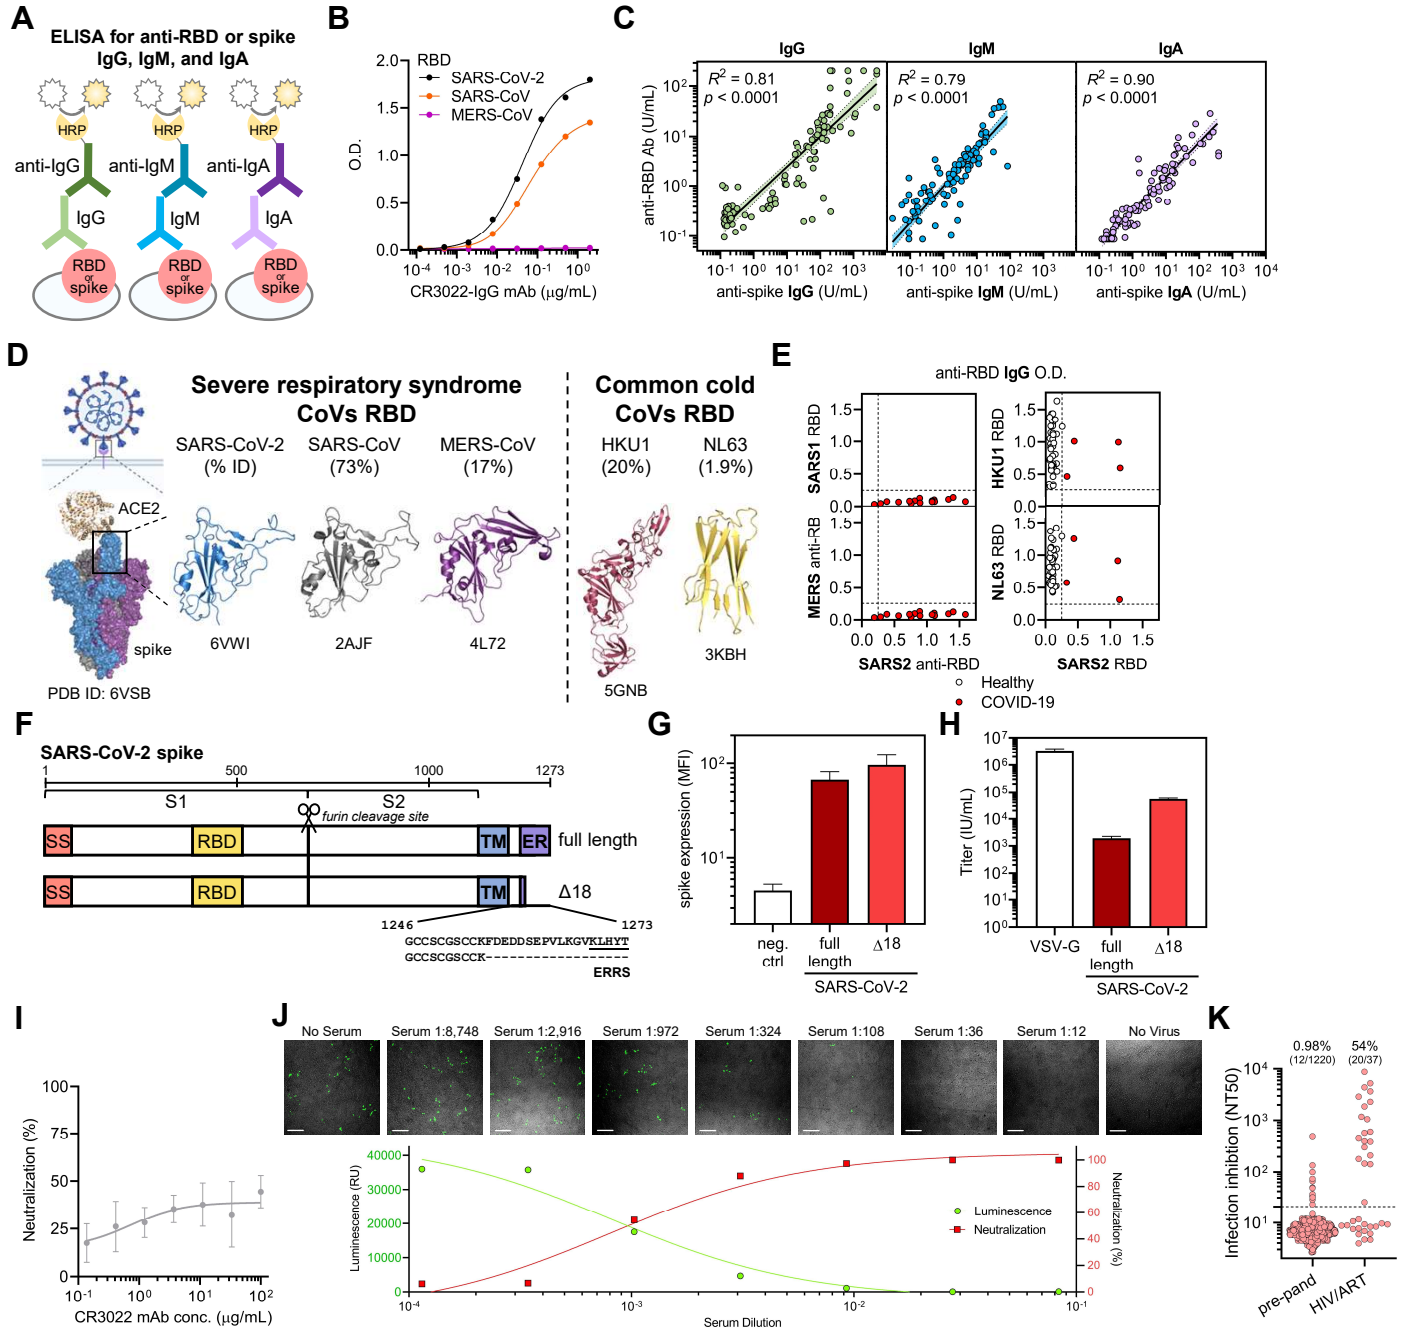

Supplement: NIHMS1655231-supplement-2.pdf [file NIHMS1655231-supplement-2.pdf]

**Figure S3**

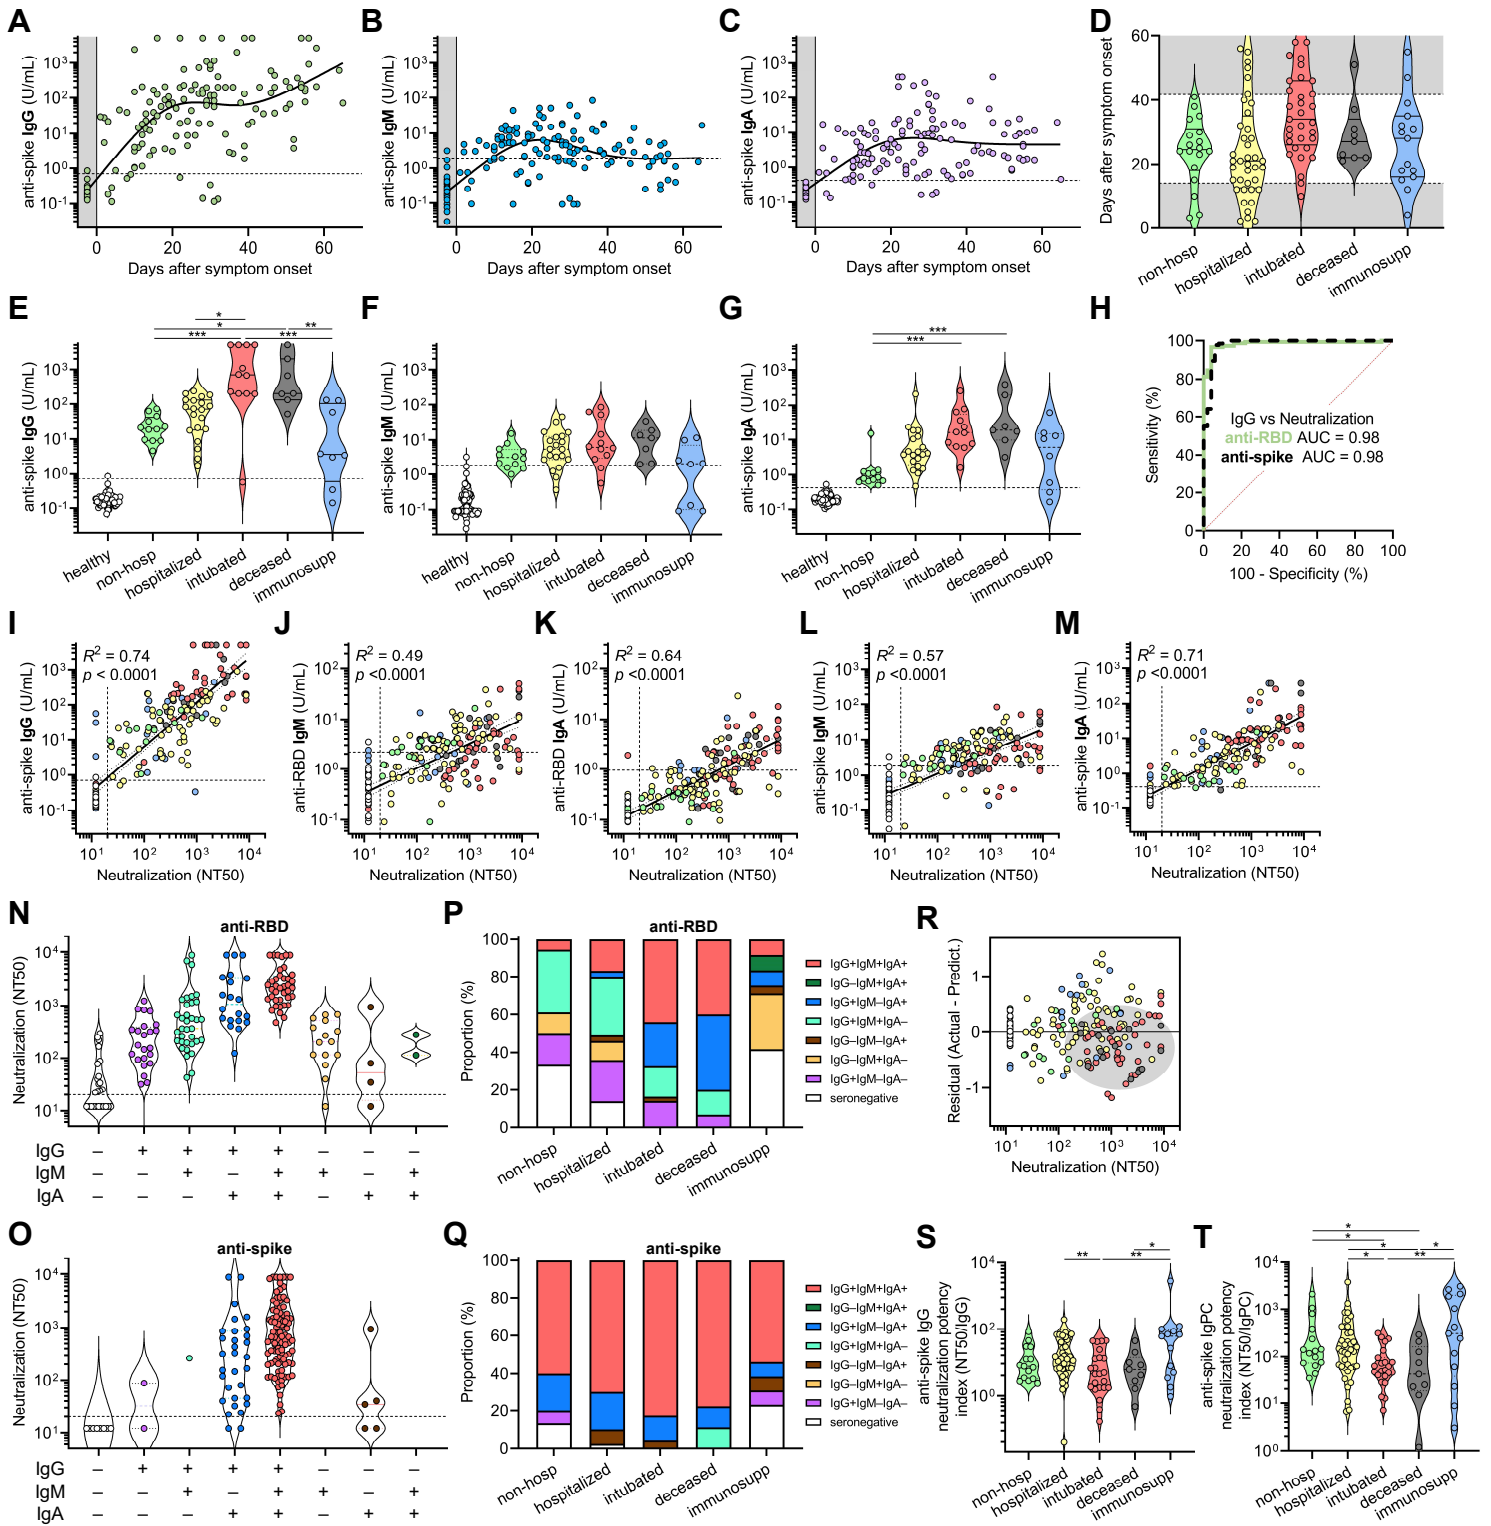

Supplement: NIHMS1655231-supplement-3.pdf [file NIHMS1655231-supplement-3.pdf]

Figure S4

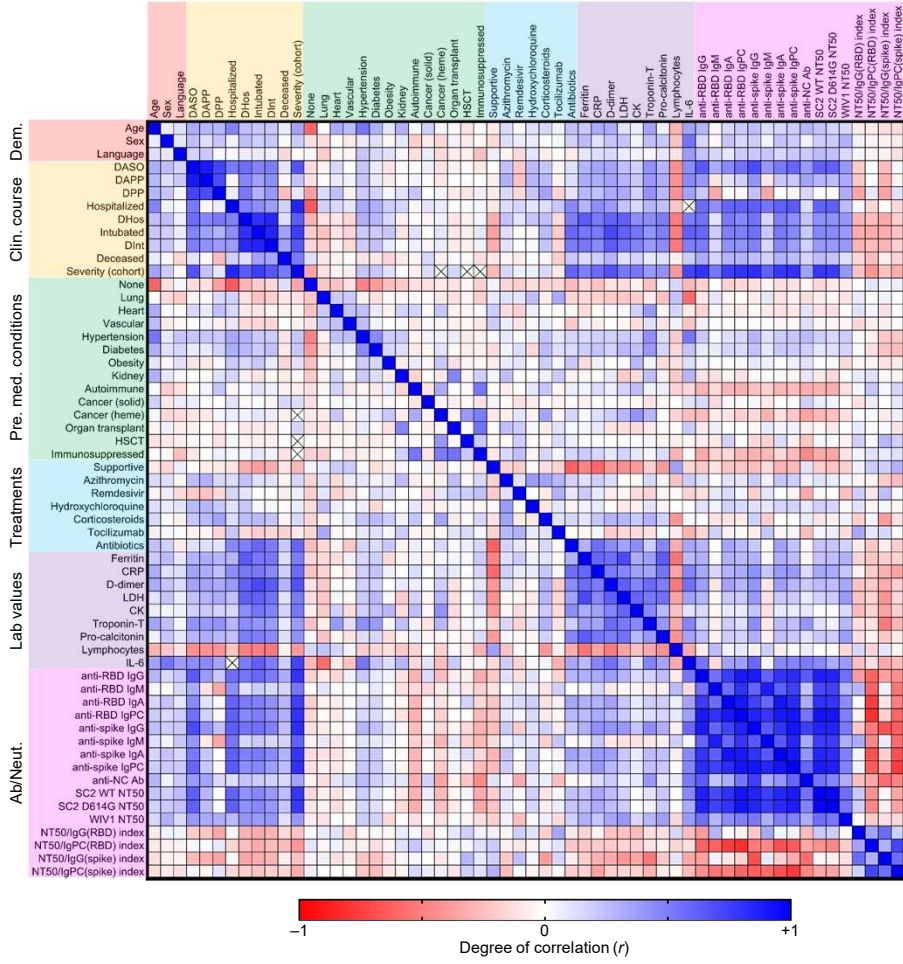

Supplement: NIHMS1655231-supplement-4.pdf [file NIHMS1655231-supplement-4.pdf]

**Figure S5**

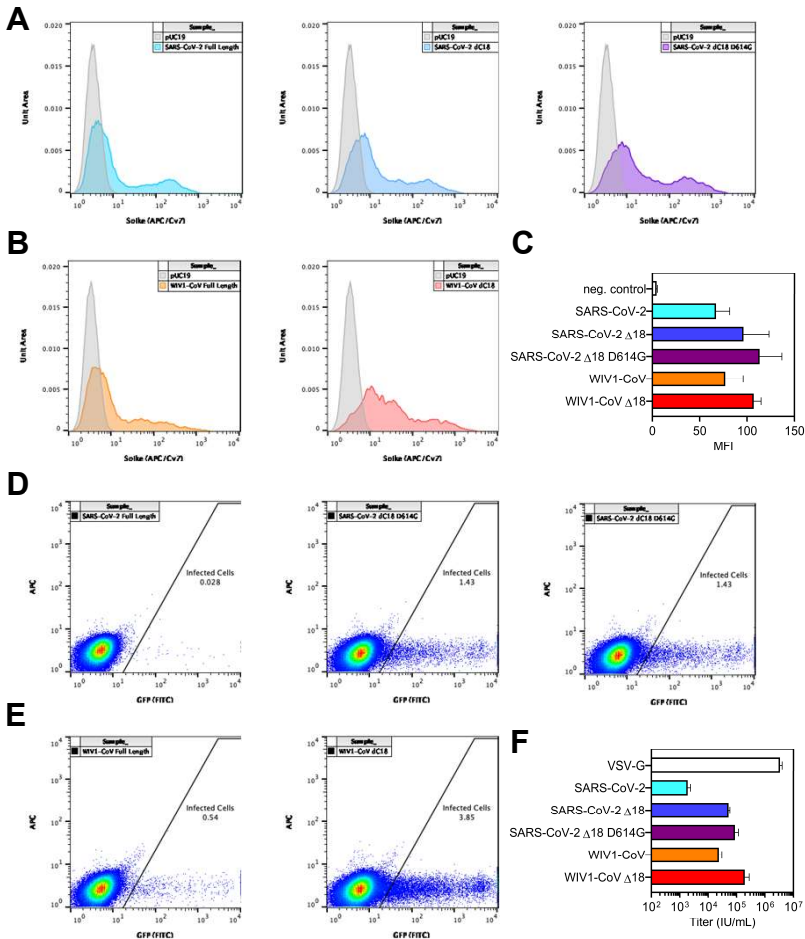

Supplement: NIHMS1655231-supplement-5.pdf [file NIHMS1655231-supplement-5.pdf]
